# Supplementary material for: Oncogenic BRAF disrupts thyroid morphogenesis and function via twist expression
Source: eLife journal article supplement (doi:10.7554/elife.20728), 2017-03-28

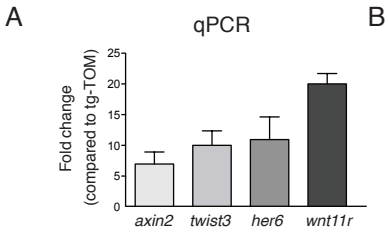

**Gene sets enriched in tg-TOM-BRAF<sup>V600E</sup>**

| H: hallmark gene sets                  | ES   | NES  | FDR q-value |
|----------------------------------------|------|------|-------------|
| 1 TGF- $\beta$ signaling               | 0.50 | 1.86 | 0.011       |
| 2 Glycolysis                           | 0.37 | 1.77 | 0.012       |
| 3 Epithelial to mesenchymal transition | 0.34 | 1.63 | 0.035       |
| 4 TNF- $\alpha$ signaling via NFkB     | 0.34 | 1.58 | 0.042       |
| 5 Hypoxia                              | 0.33 | 1.58 | 0.034       |
| 6 P13K-AKT-mTOR signaling              | 0.36 | 1.53 | 0.048       |
| 7 Wnt $\beta$ -catenin signaling       | 0.42 | 1.49 | 0.061       |
| 8 Apical surface                       | 0.42 | 1.47 | 0.059       |
| 9 Mitotic spindle                      | 0.30 | 1.45 | 0.066       |
| 10 Apoptosis                           | 0.30 | 1.37 | 0.114       |

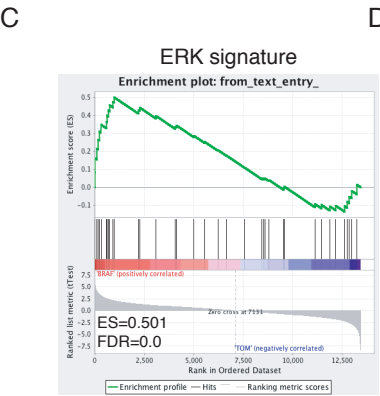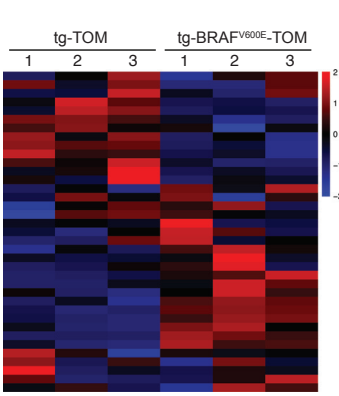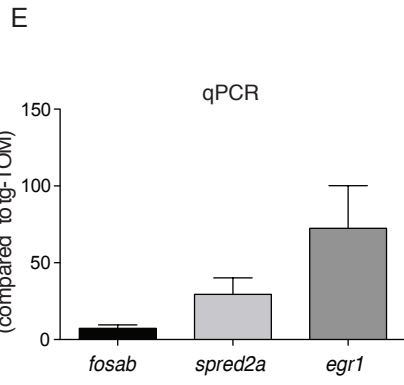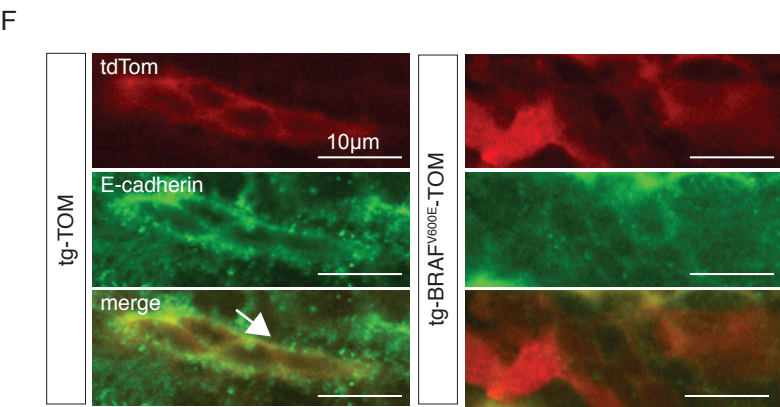

Supplement: supp [file elife-20728-supp-v1.zip]
