# Supplementary figures and images for: Oncogenic BRAF disrupts thyroid morphogenesis and function via twist expression
Source: eLife journal article supplement (doi:10.7554/elife.20728), 2017-03-28

**A**

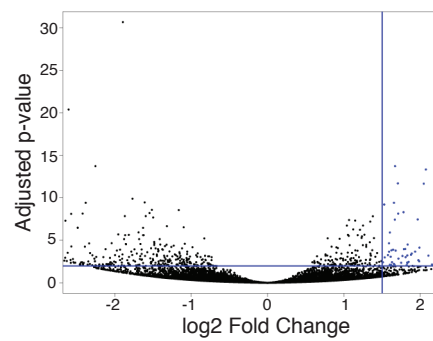

**B**

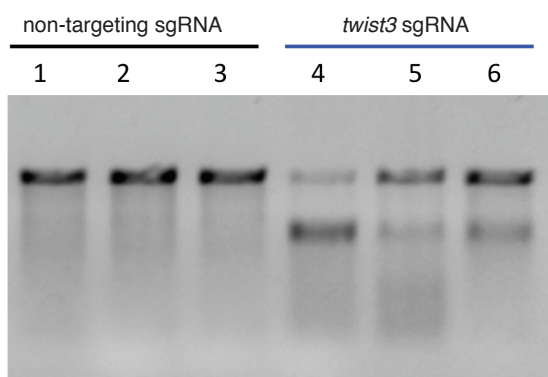

**C**

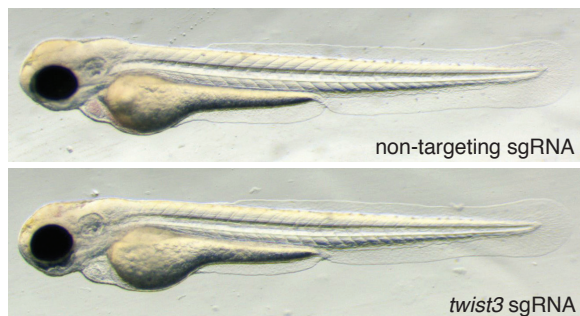

Supplement: supp [file elife-20728-supp-v1.zip]

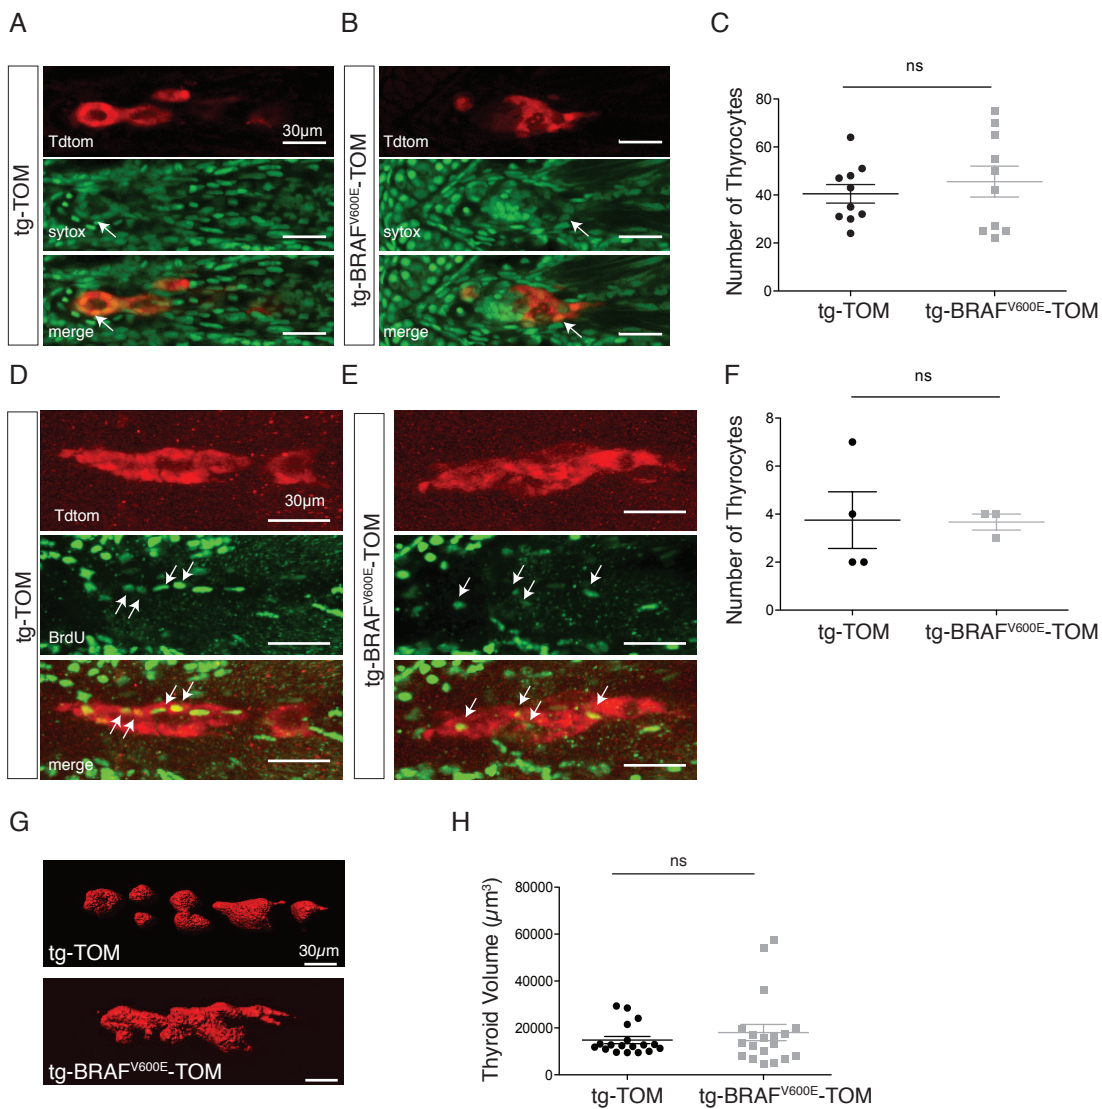

Supplement: supp [file elife-20728-supp-v1.zip]
